# Supplementary material
Source: PubMed Central journal article supplement (PMC5705818)
Supplement: MCB.00418-17_zmb024171668s1.pdf [file MCB.00418-17_zmb024171668s1.pdf]

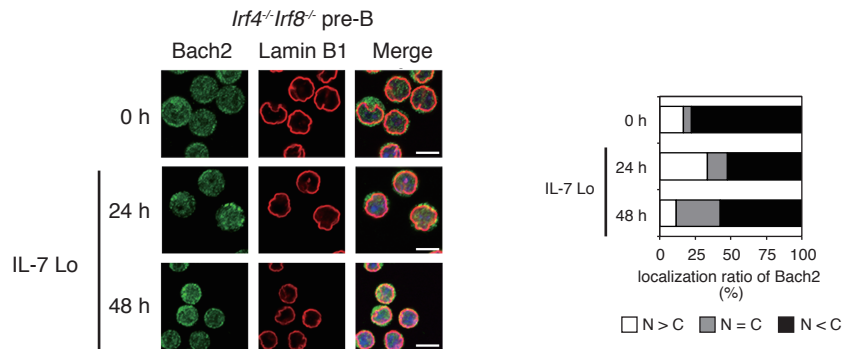

### Supplemental Figure 1. Nuclear accumulation of Bach2 protein by attenuation of IL-7 signaling.

IL-7 signaling was attenuated in *Irf4<sup>-/-</sup>Irf8<sup>-/-</sup>* pre-B cells by changing the concentration of IL-7 in the culture medium from 5.0 ng/mL (IL-7 Hi) to 0.1 ng/mL (IL-7 Lo) for indicated hours, and subcellular localization of Bach2 protein were examined by using immunohistochemistry. Left; Bach2 (green) and Lamin B1 (red) distribution in cells. Right; the subcellular localization of Bach2 was evaluated by classification with counted 100 cells for each condition: nucleus-dominant (N > C), nucleus and cytoplasm (N = C), cytoplasm-dominant (N < C). Scale bar = 10  $\mu$ m.

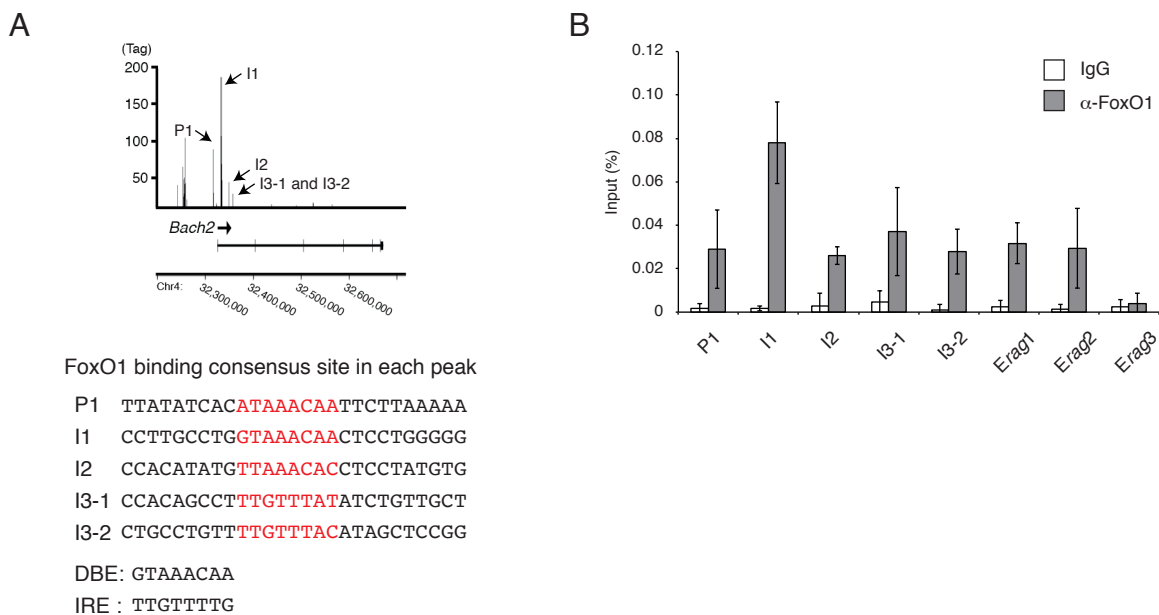

### Supplemental Figure 2. FoxO1 directly binds to *Bach2* gene locus.

(A) Upper; FoxO1-binding peaks at *Bach2* locus identified by using previously reported ChIPseq (Ochiai K. 2012) and presented with Integrated Genome Browser (IGB) in terms of normalized tag counts. P, binding peak at promoter region; C, binding peaks at coding regions. Lower; FoxO1 consensus in identified regions. DBE, the DAF-16 binding element; IRE, the insulin response element.

(B) FoxO1 ChIP with control immunoglobulin G (IgG) and anti-FoxO1 ( $\alpha$ -FoxO1) in *Irf4<sup>-/-</sup>Irf8<sup>-/-</sup>* pre-B cells cultured 48 h with IL-7 Lo as in Fig. S1, followed by quantitative PCR analysis of the binding of FoxO1 at *Bach2* locus. *Erag1* and *Erag2* as positive control regions, and *Erag3* as negative control region. The mean and SEM is from three independent experiments.

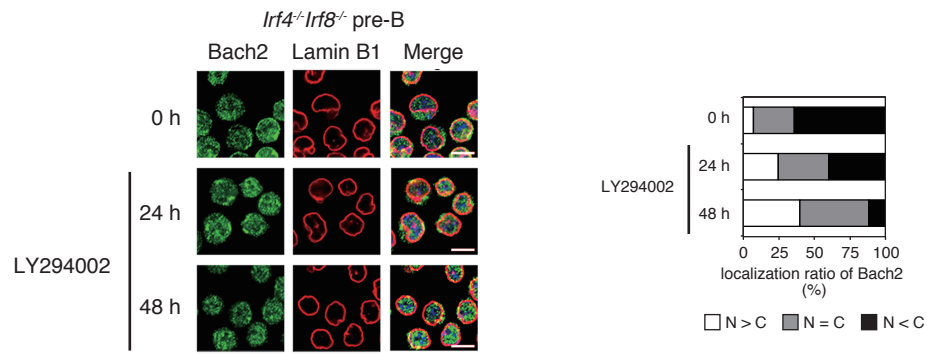

**Supplemental Figure 3. PI3K inhibitor promotes nuclear accumulation of Bach2 protein under the presence of IL-7 signaling.**

*Irf4<sup>-/-</sup>Irf8<sup>-/-</sup>* pre-B cells were cultured in the presence of LY294002 under IL-7 Hi condition for indicated time, and subcellular localization of Bach2 protein were examined by using immunohistochemistry. Left; Bach2 (green) and Lamin B1 (red) distribution in cells. Right; the subcellular localization of Bach2 was evaluated by classification with counted 100 cells for each condition: nucleus-dominant ( $N > C$ ), nucleus and cytoplasm ( $N = C$ ), cytoplasm-dominant ( $N < C$ ). Scale bar = 10  $\mu$ m.

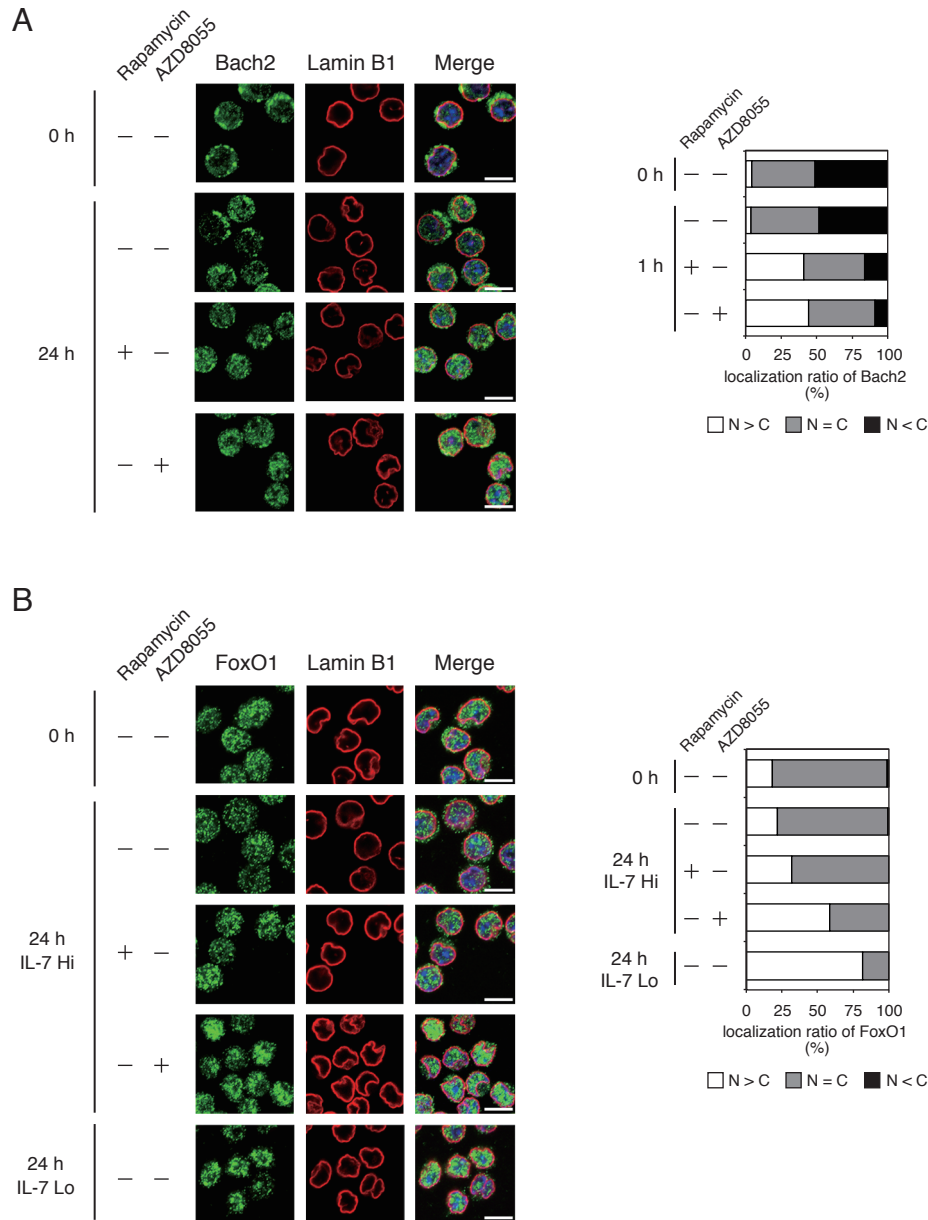

**Supplemental Figure 4. Distinct protein regulation of Bach2 and FoxO1 under mTOR signaling.**

*Irf4*<sup>-/-</sup>*Irf8*<sup>-/-</sup> pre-B cells were cultured in the presence of 20 nM rapamycin or 500 nM AZD8055 under IL-7 Hi condition for 24 h, and subcellular localization of Bach2 protein (A) or FoxO1 protein (B) were examined by using immunohistochemistry. Left; Bach2 or FoxO1 (green) and Lamin B1 (red) distribution in cells. Right; the subcellular localization of Bach2 or FoxO1 was evaluated by classification with counted 100 cells for each condition: nucleus-dominant (N > C), nucleus and cytoplasm (N = C), cytoplasm-dominant (N < C). Scale bar = 10 μm.

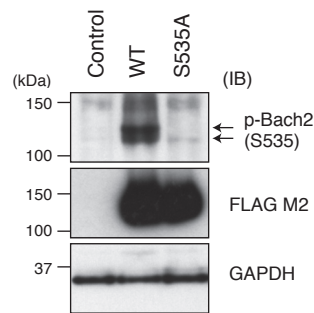

**Supplemental Figure 5. Detection of Bach2 phosphorylation of S535 by a generated monoclonal antibody.**

Immunoblot analysis using monoclonal antibody against Bach2 phosphorylated at S535. 293-derived Plat-E cells were transfected with pcDNA FLAG-Bach2WT or pcDNA FLAG-Bach2S535A, and whole cell extracts were prepared at 24 h post transfection. Expression of each plasmid was examined with anti-FLAG M2 antibody, and GAPDH was served as internal control. IB, immunoblot; kDa, kilodalton.

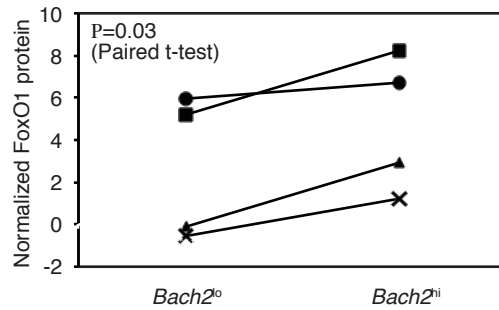

**Supplemental Figure 6. The higher FoxO1 protein in *Bach2<sup>hi</sup>* pre-B cells.**

Intracellular staining of FoxO1 in pre-B cells obtained from *Bach2*-RFP reporter mice. *Bach2<sup>hi</sup>* and *Bach2<sup>lo</sup>*-RFP indicate population with higher and lower expression of RFP, respectively. FoxO1 protein amounts were analyzed, and the geometric mean fluorescence intensity were subtracted with control IgG staining. Normalized data were shown as a graph with marks which indicate each four mice used for this analysis.

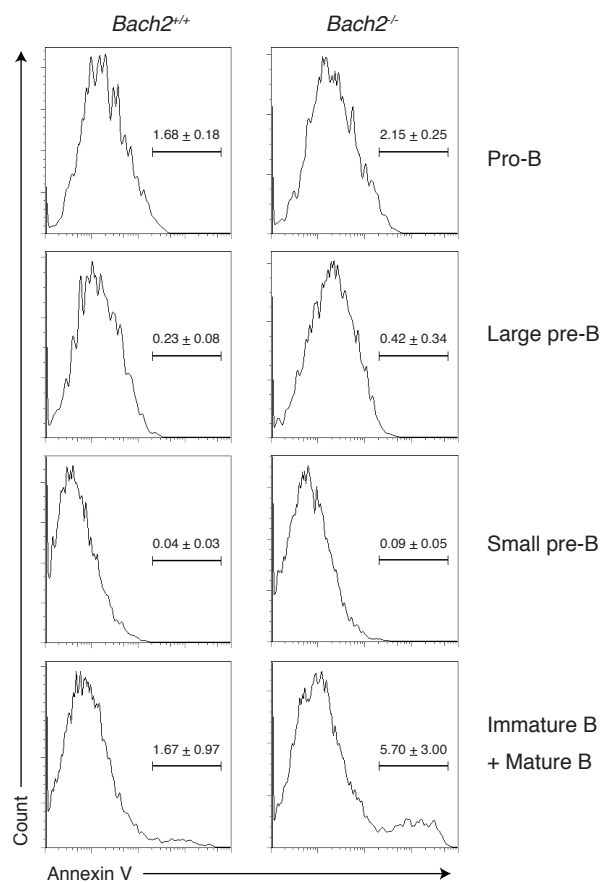

**Supplemental Figure 7. The frequency of apoptosis cells were increased in *Bach2<sup>-/-</sup>* cells.**

Bone marrow B cells from wild-type (*Bach2<sup>+/+</sup>*) and *Bach2*-deficient (*Bach2<sup>-/-</sup>*) mice were stained with Annexin V, and analyzed using flow cytometry. Data is representative of three mice analysis for each genotype in one experiment, and shown with the means and SEM respectively.

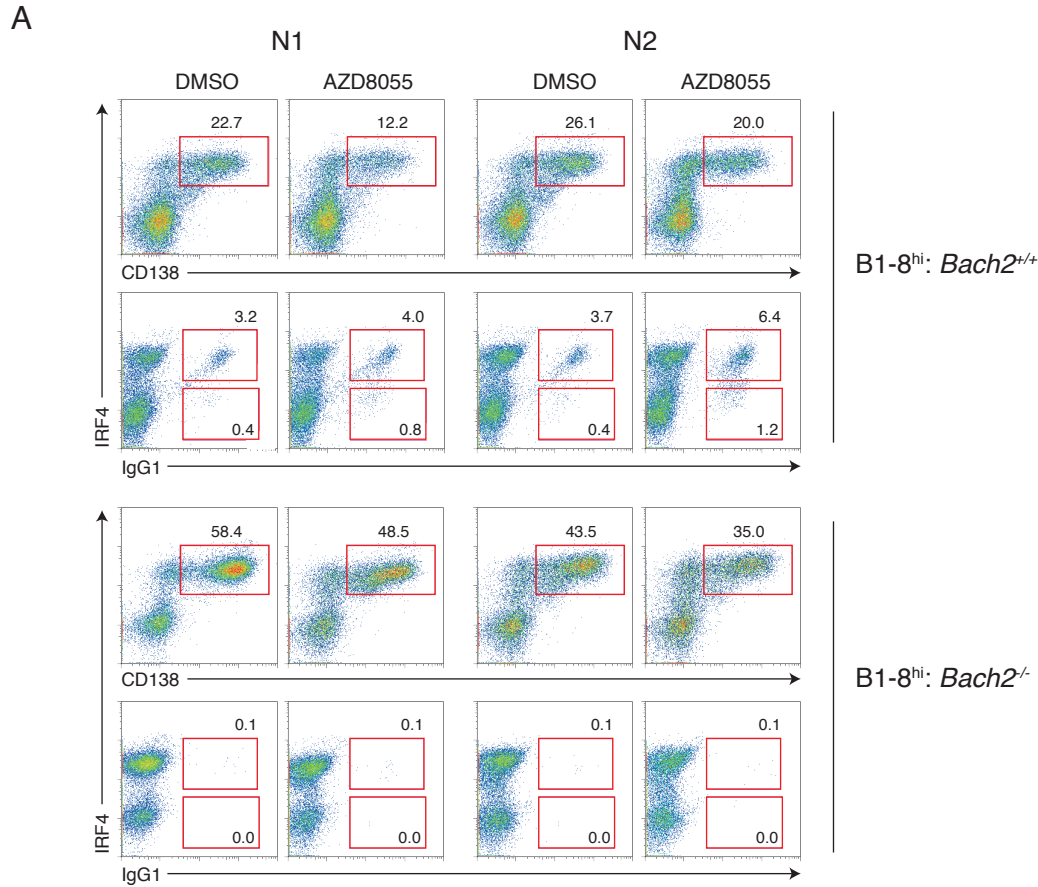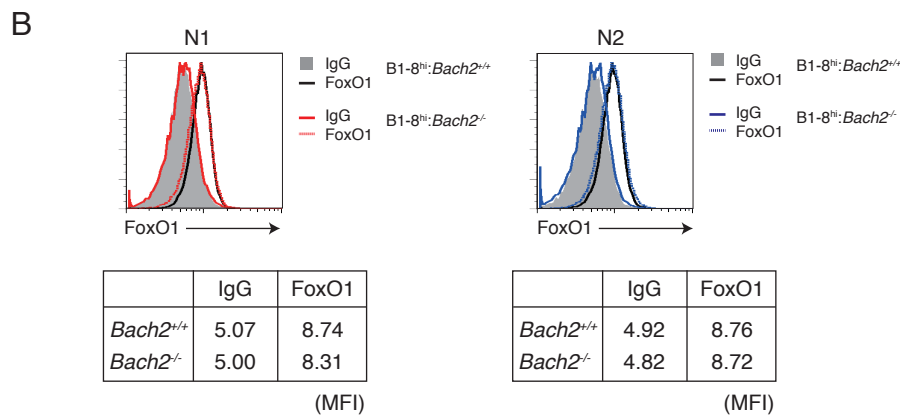

**Supplemental Figure 8. *Bach2*-dependent increase of CSR frequency and inhibition of PC with AZD8055 treatment.**

(A) Flow cytometry analysis of intracellular IRF4, CD138, and IgG1. Splenic B cells were isolated from *Bach2*<sup>+/+</sup> and *Bach2*<sup>-/-</sup> under B1-8<sup>hi</sup> background, and cultured with IL-2, IL-4, IL-5, CD40L and NP-ficol in the presence of DMSO or AZD8055 for 72 h.

(B) Intracellular staining of FoxO1 protein in splenic B cells isolated from *Bach2*<sup>+/+</sup> and *Bach2*<sup>-/-</sup> under B1-8<sup>hi</sup> background. FoxO1 protein amounts were shown with log scale (x-axis). The geometric mean fluorescence intensity of each data was shown at the bottom of histogram.

For A and B, data are from one experiment using two mice for each genotype.

Supplemental Table 1

| GeneSymbol    | FC ([4Bach2] vs [MigR]) | FC ([Lo] vs [Hi]) |
|---------------|-------------------------|-------------------|
| Pqbp1         | -5.09                   | -2.93             |
| Fbp1          | -2.87                   | -29.39            |
| Cst7          | -1.88                   | -48.81            |
| Wfdc13        | -1.75                   | -2.09             |
| Iqgap3        | -1.75                   | -35.79            |
| Dhcr7         | -1.71                   | -2.62             |
| Nfix          | -1.66                   | -2.90             |
| Wee1          | -1.65                   | -6.00             |
| Prrc2a        | -1.58                   | -2.30             |
| Myom3         | -1.56                   | -2.78             |
| Xrcc2         | -1.55                   | -6.42             |
| Senp1         | -1.50                   | -4.18             |
| Sh3bgrl3      | -1.49                   | -2.01             |
| Cbx2          | -1.49                   | -2.00             |
| Kif18b        | -1.47                   | -44.21            |
| Cpne2         | -1.46                   | -4.59             |
| Cox6b1        | -1.46                   | -2.62             |
| Sit1          | -1.46                   | -2.39             |
| Ass1          | -1.46                   | -5.81             |
| 2310075C17Rik | -1.45                   | -5.59             |
| Nek6          | -1.45                   | -8.13             |
| Mbni3         | -1.44                   | -2.03             |
| Mt2           | -1.44                   | -6.17             |
| Nek6          | -1.43                   | -6.07             |
| Sh2d3c        | -1.43                   | -2.04             |
| Ppp4c         | -1.43                   | -3.93             |
| Rras2         | -1.43                   | -2.35             |
| Apex1         | -1.42                   | -6.97             |
| Dcakd         | -1.41                   | -3.97             |
| Aacs          | -1.40                   | -4.45             |
| Ubap2l        | -1.39                   | -2.21             |
| Sgsm2         | -1.39                   | -3.46             |
| Cbx5          | -1.38                   | -21.99            |
| Pmf1          | -1.38                   | -14.74            |
| Pgf           | -1.38                   | -2.18             |
| Dip2b         | -1.38                   | -2.10             |
| Ucp3          | -1.37                   | -5.68             |
| Hist1h1b      | -1.37                   | -19.76            |
| Slc43a3       | -1.37                   | -2.50             |
| Fntb          | -1.36                   | -3.41             |
| Crtap         | -1.36                   | -2.42             |
| Eif5a         | -1.35                   | -5.39             |
| McpH1         | -1.34                   | -4.54             |
| Gclm          | -1.34                   | -2.81             |
| Itgb4         | -1.34                   | -3.58             |
| Gapdh         | -1.34                   | -4.01             |
| Gtpbp1        | -1.34                   | -3.12             |
| Atic          | -1.34                   | -4.89             |
| Siah1b        | -1.33                   | -3.06             |
| Fzr1          | -1.32                   | -2.83             |
| Cand2         | -1.32                   | -2.50             |
| Cdk2ap1       | -1.32                   | -5.72             |
| Ube2c         | -1.32                   | -44.32            |
| Zbtb45        | -1.32                   | -3.37             |
| Ccne1         | -1.32                   | -31.85            |
| Kif11         | -1.31                   | -42.62            |
| Calu          | -1.31                   | -2.28             |
| Hcst          | -1.31                   | -3.63             |
| Mgat2         | -1.31                   | -2.45             |
| Ccnd3         | -1.31                   | -2.46             |
| Tmem180       | -1.31                   | -4.06             |
| Ndufa11       | -1.31                   | -2.61             |
| Hspa2         | -1.31                   | -2.24             |
| Stmn1         | -1.30                   | -20.16            |
| Jdp2          | -1.30                   | -5.30             |

## Supplemental Table 2

| GO ACCESSION          | GO Term                          | p-value  | corrected p-value | Count in Selection | % Count in Selection | Count in Total | % Count in Total |
|-----------------------|----------------------------------|----------|-------------------|--------------------|----------------------|----------------|------------------|
| GO:0000278            | mitotic cell cycle               | 7.22E-08 | 4.27E-04          | 11                 | 17.460318            | 446            | 2.1023853        |
| GO:1903047            | mitotic cell cycle process       | 5.35E-08 | 4.27E-04          | 11                 | 17.460318            | 433            | 2.041105         |
| GO:0005622            | intracellular                    | 1.65E-07 | 6.50E-04          | 54                 | 85.71429             | 11610          | 54.72801         |
| GO:0044424            | intracellular part               | 1.33E-06 | 0.004             | 52                 | 82.53968             | 11361          | 53.554256        |
| GO:0007049            | cell cycle                       | 2.87E-06 | 0.007             | 13                 | 20.63492             | 933            | 4.398039         |
| GO:0022402            | cell cycle process               | 4.14E-06 | 0.007             | 11                 | 17.460318            | 673            | 3.1724334        |
| GO:0051301            | cell division                    | 3.93E-06 | 0.007             | 10                 | 15.873015            | 539            | 2.540775         |
| GO:1902494            | catalytic complex                | 5.26E-06 | 0.008             | 11                 | 17.460318            | 690            | 3.252569         |
| GO:0005634            | nucleus                          | 1.33E-05 | 0.018             | 32                 | 50.79365             | 5391           | 25.412464        |
| GO:0000280            | nuclear division                 | 2.09E-05 | 0.023             | 8                  | 12.698413            | 394            | 1.857264         |
| GO:0007067            | mitotic nuclear division         | 2.04E-05 | 0.023             | 7                  | 11.111111            | 283            | 1.3340247        |
| GO:0048285            | organelle fission                | 3.24E-05 | 0.032             | 8                  | 12.698413            | 419            | 1.9751108        |
| GO:0043229            | intracellular organelle          | 6.77E-05 | 0.056             | 45                 | 71.42857             | 9947           | 46.888847        |
| GO:0010035            | response to inorganic substance  | 6.79E-05 | 0.056             | 6                  | 9.523809             | 234            | 1.1030451        |
| GO:0051726 GO:0000000 | regulation of cell cycle         | 7.05E-05 | 0.056             | 9                  | 14.285714            | 605            | 2.8518903        |
| GO:1990234            | transferase complex              | 7.95E-05 | 0.059             | 8                  | 12.698413            | 476            | 2.2438014        |
| GO:0008152            | metabolic process                | 8.95E-05 | 0.062             | 40                 | 63.49206             | 8346           | 39.341946        |
| GO:0043226            | organelle                        | 1.01E-04 | 0.066             | 45                 | 71.42857             | 10081          | 47.520504        |
| GO:0000152            | nuclear ubiquitin ligase complex | 1.53E-04 | 0.095             | 3                  | 4.7619047            | 35             | 0.16498539       |



Supplemental Table 3

| primer                          | Sequence 5' → 3'             |
|---------------------------------|------------------------------|
| [RT-PCR]                        |                              |
| <i>Bach2</i> Forward            | AGTTCATCCACGACATCC           |
| <i>Bach2</i> Reverse            | AGGTGATTCTCTCCGAC            |
| <i>β2-microglobulin</i> Forward | AGACTGATACATACGCCTGCA        |
| <i>β2-microglobulin</i> Reverse | GCAGGTTCAAATGAATCTTCAG       |
| <i>Pax5</i> Forward             | TCTACAGGCTCCGTGACGCA         |
| <i>Pax5</i> Reverse             | GAACAGGTCTCCCGCATCT          |
| <i>Rag1</i> Forward             | CTGCAGACATTCTAGCACTC         |
| <i>Rag1</i> Reverse             | AACTGAAGCTCAGGGTAGAC         |
| <i>Rag2</i> Forward             | CCTTCAGTGCCAAAATAAGA         |
| <i>Rag2</i> Reverse             | TCATAAGTGAGAAGCCTGGT         |
| <i>p27</i> Forward              | CTGACTCGTCAGACAATCC          |
| <i>p27</i> Reverse              | TTCTTAATTCGGAGCTGTTT         |
| <i>Aiolos</i> Forward           | GGACACCTTAGGACACATTC         |
| <i>Aiolos</i> Reverse           | CTCTGCTTGTAGCTTCTTCC         |
| <i>Ccnd3</i> Forward            | GAAGCTTGCATCTATACGG          |
| <i>Ccnd3</i> Reverse            | ATCGCAAAGGTGTAATCTGT         |
| <i>Ccne1</i> Forward            | CCCCAGGACTGCATTTACAGC        |
| <i>Ccne1</i> Reverse            | TGACGCTGCAGAAAGTGCTCA        |
| [ChIP-PCR]                      |                              |
| <i>Foxo1</i> P1 Forward         | TTAGCACTGTTCGGGTTG           |
| <i>Foxo1</i> P1 Reverse         | CCCAAAGAGTCAGTGAGACA         |
| <i>Foxo1</i> I1 Forward         | GAAGAGAGGCTGACTGGTTA         |
| <i>Foxo1</i> I1 Reverse         | GGTAGCAAGCAACTCTGACT         |
| <i>Foxo1</i> I2 Forward         | TCTCCCTCATTCAACACTTC         |
| <i>Foxo1</i> I2 Reverse         | TAACCGAAGCACAGTTCCCT         |
| <i>Foxo1</i> I3-1 Forward       | GGGTGTGACTAGCAAGTGAAG        |
| <i>Foxo1</i> I3-1 Reverse       | AGGCTAGGCGCTTTGTTT           |
| <i>Foxo1</i> I3-2 Forward       | AAGATGCTGTACCTGACTT          |
| <i>Foxo1</i> I3-2 Reverse       | CAGCATTTCACTTTCTGA           |
| <i>Erag1</i> Forward            | ACACCCATAATGGGCCGTGAAC       |
| <i>Erag1</i> Reverse            | CAGAACCCGAGGGCTTAGCATT       |
| <i>Erag2</i> Forward            | AACTTCCTCCAGCAGGCGATCT       |
| <i>Erag2</i> Reverse            | ACCCATTTCCAAGCAGGAGAGG       |
| <i>Erag3</i> Forward            | AAGCCTCTCTTTGTACCCAACCTCAC   |
| <i>Erag3</i> Reverse            | TTGACTGTGCTAGTTCAGCCAAAGGAAT |
| <i>Ccne1</i> Forward            | TGCATTTGGTCTTTCATCAT         |
| <i>Ccne1</i> Reverse            | TGGACCCTATAACCGCACT          |
| <i>Ccnd3</i> -1Forward          | TTACAGGCATGGAAAGTACC         |
| <i>Ccnd3</i> -1Reverse          | TAGGACTCACGTCATTAGGC         |
| <i>Ccnd3</i> -2 Forward         | CCCTTTCCGCCTAGAAAT           |
| <i>Ccnd3</i> -2 Reverse         | TGGACCAAGTGTGAATACCA         |
| <i>Hmox1</i> Forward            | GGGCTAGCATGCGAAGTGAG         |
| <i>Hmox1</i> Reverse            | AGACTCCGCCCTAAGGGTTC         |
